# Supplementary material
Source: PubMed Central journal article supplement (PMC4547883)
Supplement: NIHMS689047-supplement.pdf [file NIHMS689047-supplement.pdf]

## Supplemental Data

### Suppl. 1

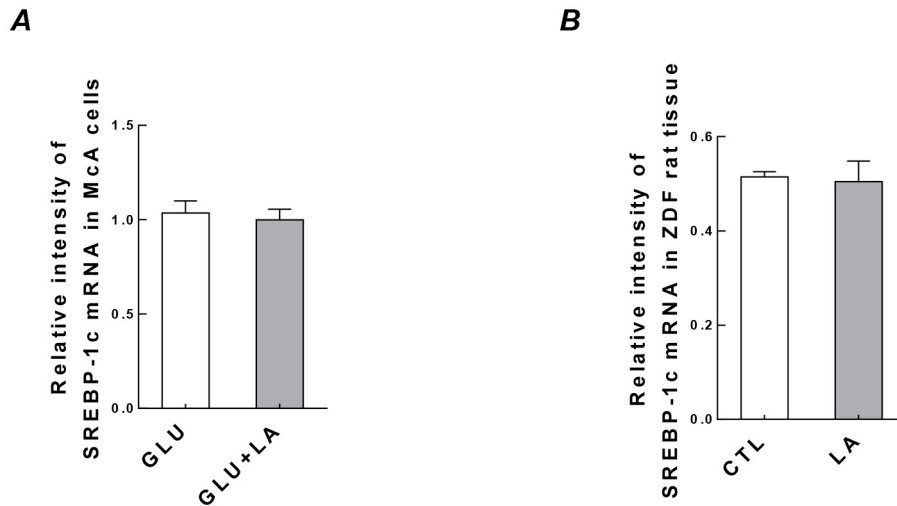

**Supplementary Figure 1.** LA does not affect SREBP-1c mRNA in McA cells and ZDF rats. (A) McA cells were cultured in either glucose (6 mM) alone or plus LA (200  $\mu$ M) for 48 hours. (B) Livers were isolated from 11-wk old ZDF rats fed an LA-supplemented diet for two weeks and from pair-fed controls. Total RNA was extracted from cell lysates and liver tissues to detect mRNA expression of SREBP-1c. Transcript levels were normalized to internal control 18S ribosomal RAN. Results are shown as means  $\pm$  SD for two experiments performed in triplicate and n of 4 per group for the animal study.

## Suppl. 2

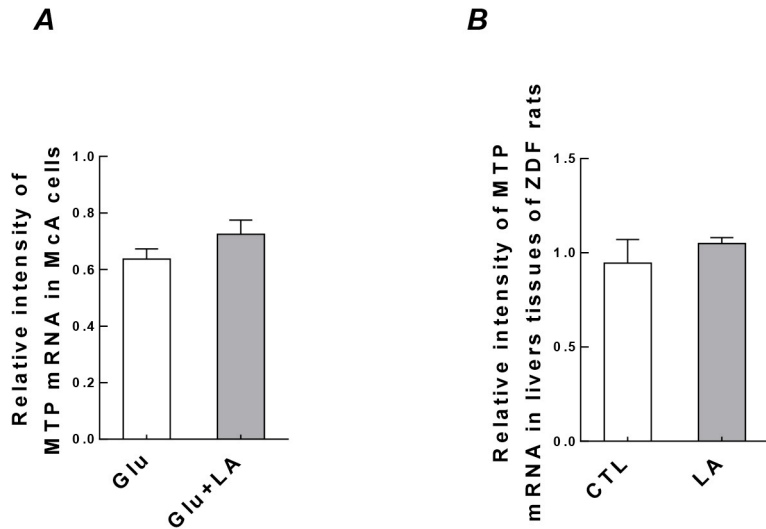

**Supplementary Figure 2.** LA does not affect MTP expression in McA cells and ZDF rats. (A) McA cells were cultured in either glucose (6 mM) alone or plus LA (200  $\mu$ M) for 48 hours. Total RNA was extracted from cell lysates to detect mRNA expression of MTP. (B) Livers were isolated from 11-wk old ZDF rats fed an LA-supplemented diet for two weeks and from pair-fed controls. Total RNA was extracted from liver tissues to detect mRNA expression of MTP. Transcript levels were normalized to internal control 18S ribosomal RAN. Results are shown as means  $\pm$  SD (n=4/group).
